# Supplementary material for: Lower-extremity joint kinematics and muscle activations during semi-reclined cycling at different workloads in healthy individuals
Source: PubMed Central journal article supplement (PMC4216842; doi:10.1186/1743-0003-11-146), 2014-10-17

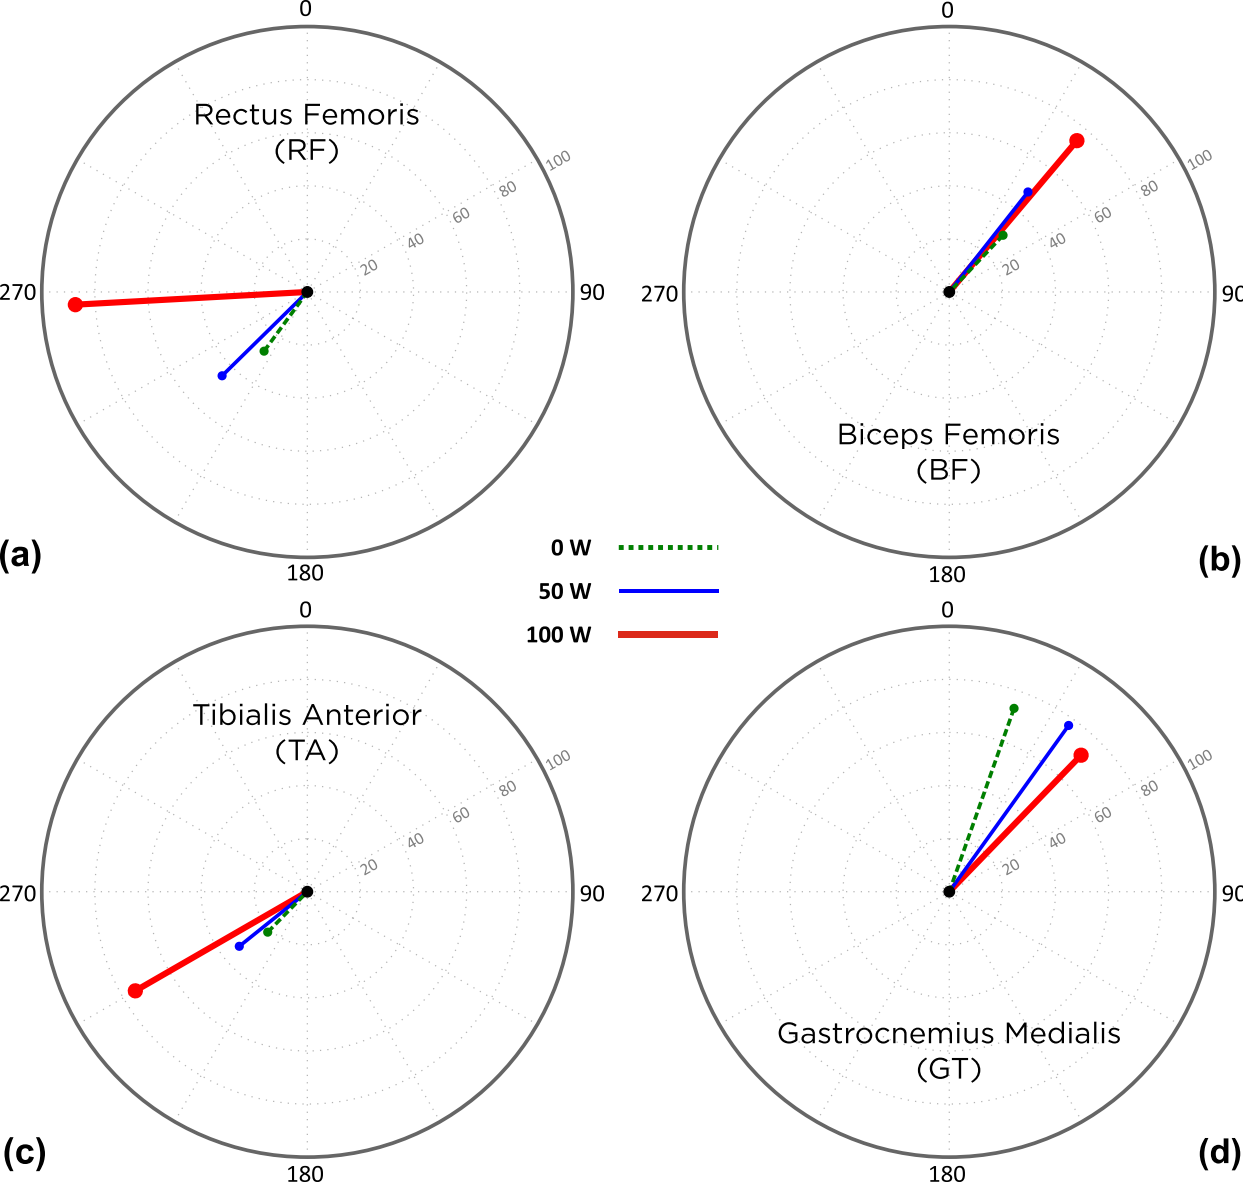

Supplement: 12984_2014_665_MOESM6_ESM.pdf [file 12984_2014_665_MOESM6_ESM.pdf]
